# Supplementary material
Source: publisher site journal article supplement (https://www.dovepress.com/article/339378)
Supplement: Supplementary file 1 [file get_supplementary_file.php]

**eTable 1.** Stratified Analyses for the Association of NLR Levels with Cancer Mortality a

|  | **NLR level, hazard ratio (95% CI)** | | **P value for** |
| --- | --- | --- | --- |
| **Variable** | **Low-NLR** | **High-NLR** | **interaction** |
| Age |  |  |  |
| <60 | 1 [Reference] | 1.31 (0.60, 2.85) | 0.81 |
| ≥60 | 1 [Reference] | 1.38 (0.85, 2.26) |  |
| Gender |  |  |  |
| Male | 1 [Reference] | 1.15 (0.67, 1.99) | 0.63 |
| Female | 1 [Reference] | 1.42 (0.75, 2.68) |  |
| Ethnicity |  |  |  |
| Non-Hispanic white | 1 [Reference] | 1.19 (0.75, 1.88) | 0.8 |
| Non-Hispanic black | 1 [Reference] | 2.37 (0.69, 8.18) |  |
| Mexican American | 1 [Reference] | 1.28 (0.16, 10.57) |  |
| Others | 1 [Reference] | 1.04 (0.14, 7.55) |  |
| Smoking status |  |  |  |
| Never smoker | 1 [Reference] | 1.57 (0.75, 3.28) | 0.8 |
| Former smoker | 1 [Reference] | 1.20 (0.64, 2.26) |  |
| Current smoker | 1 [Reference] | 1.12 (0.49, 2.55) |  |
| BMI |  |  |  |
| <18.5 | 1 [Reference] | 1.43 (0.10, 20.13) | 0.92 |
| 18.5-24.9 | 1 [Reference] | 1.32 (0.63, 2.74) |  |
| 25-29.9 | 1 [Reference] | 1.49 (0.76, 2.90) |  |
| >30 | 1 [Reference] | 1.01 (0.45, 2.29) |  |

a All estimates accounted for complex survey designs.

Abbreviations: NLR, neutrophil-lymphocyte ratio; BMI, body mass index.

Risk estimates were adjusted for baseline age, sex, race/ethnicity, education level, marital status, family income poverty ratio level, drinking and smoking status, body mass index, and self-reported general health. And group variables were not adjusted for in that subgroup analysis.

**eTable 2.** Stratified Analyses for the Association of NLR Levels with Cardiovascular Disease Mortality a

|  | **NLR level, hazard ratio (95% CI)** | | **P value for** |
| --- | --- | --- | --- |
| **Variable** | **Low-NLR** | **High-NLR** | **interaction** |
| Age |  |  |  |
| <60 | 1 [Reference] | 1.81 (0.69, 4.69) | 0.92 |
| ≥60 | 1 [Reference] | 1.59 (1.02, 2.50) |  |
| Gender |  |  |  |
| Male | 1 [Reference] | 1.37 (0.81, 2.31) | 0.77 |
| Female | 1 [Reference] | 1.60 (0.84, 3.04) |  |
| Ethnicity |  |  |  |
| Non-Hispanic white | 1 [Reference] | 1.42 (0.92, 2.22) | 0.95 |
| Non-Hispanic black | 1 [Reference] | 1.16 (0.21, 6.42) |  |
| Mexican American | 1 [Reference] | 2.15 (0.29, 15.78) |  |
| Others | 1 [Reference] | 1.00 (0.15, 6.89) |  |
| Smoking status |  |  |  |
| Never smoker | 1 [Reference] | 1.24 (0.63, 2.44) | 0.83 |
| Former smoker | 1 [Reference] | 1.66 (0.90, 3.06) |  |
| Current smoker | 1 [Reference] | 1.45 (0.55, 3.84) |  |
| BMI |  |  |  |
| <18.5 | 1 [Reference] | 0.93 (0.05, 16.51) | 0.98 |
| 18.5-24.9 | 1 [Reference] | 1.51 (0.73, 3.12) |  |
| 25-29.9 | 1 [Reference] | 1.39 (0.70, 2.76) |  |
| >30 | 1 [Reference] | 1.46 (0.69, 3.11) |  |

a All estimates accounted for complex survey designs.

Abbreviations: NLR, neutrophil-lymphocyte ratio; BMI, body mass index.

Risk estimates were adjusted for baseline age, sex, race/ethnicity, education level, marital status, family income poverty ratio level, drinking and smoking status, body mass index, and self-reported general health. And group variables were not adjusted for in that subgroup analysis.

**eTable 3**. Sensitivity Analyses for the Association of NLR Levels with All-Cause Mortality a

|  | **NLR level** | | |
| --- | --- | --- | --- |
|  | **Continuous NLR** | **Low-NLR** | **High-NLR** |
| All participants |  |  |  |
| No. of deaths | 4092 | 2833 | 1259 |
| Hazard ratio (95% confidence interval) | 1.11 (1.06, 1.16) | 1 [Reference] | 1.43 (1.18, 1.73) |
| Sensitivity analysis 1 b |  |  |  |
| No. of deaths | 4092 | 2833 | 1259 |
| Hazard ratio (95% confidence interval) | 1.10 (1.05, 1.15) | 1 [Reference] | 1.35 (1.11, 1.63) |
| Sensitivity analysis 2 c |  |  |  |
| No. of deaths | 3935 | 2789 | 1146 |
| Hazard ratio (95% confidence interval) | 1.19 (1.10, 1.29) | 1 [Reference] | 1.39 (1.14, 1.69) |
| Sensitivity analysis 3 d |  |  |  |
| No. of deaths | 3007 | 2146 | 861 |
| Hazard ratio (95% confidence interval) | 1.10 (1.04, 1.16) | 1 [Reference] | 1.36 (1.09, 1.70) |
| Sensitivity analysis 4 e |  |  |  |
| No. of deaths | 1636 | 1213 | 423 |
| Hazard ratio (95% confidence interval) | 1.11 (1.02, 1.20) | 1 [Reference] | 1.43 (1.05, 1.94) |

a Complex survey designs are considered for all estimates. Risk estimates were adjusted for baseline age, sex, race/ethnicity, education level, marital status, family income poverty ratio level, drinking and smoking status, body mass index, and self-reported general health.

b Risk estimates were additionally adjusted for baseline history of cancer, diabetes, chronic kidney disease, cardiovascular diseases, hypertension, hyperlipemia, chronic obstructive pulmonary diseases.

c Participants with the extreme 1% of the NLR ratio were excluded. A total of 628 participants were further excluded in analyses due to being extreme 1% of NLR.

d Participants with less than 35 months of follow-up were excluded. A total of 5291 participants were further excluded in analyses due to less than 35 months of follow up.

e Participants with prevalent cancer, diabetes or cardiovascular diseases were excluded. A total of 9475 participants were further excluded in analyses due to having these diseases.

Abbreviations: NLR, neutrophil-lymphocyte ratio.

**eTable 4**. Sensitivity Analyses for the Association of NLR Levels with Cancer Mortality a

|  | **NLR level** | | |
| --- | --- | --- | --- |
|  | **Continuous NLR** | **Low-NLR** | **High-NLR** |
| All participants |  |  |  |
| No. of deaths | 884 | 642 | 242 |
| Hazard ratio (95% confidence interval) | 1.05 (0.93, 1.19) | 1 [Reference] | 1.27 (0.84, 1.92) |
| Sensitivity analysis 1 b |  |  |  |
| No. of deaths | 884 | 642 | 242 |
| Hazard ratio (95% confidence interval) | 1.06 (0.94, 1.19) | 1 [Reference] | 1.23 (0.81, 1.87) |
| Sensitivity analysis 2 c |  |  |  |
| No. of deaths | 844 | 622 | 222 |
| Hazard ratio (95% confidence interval) | 1.11 (0.93, 1.33) | 1 [Reference] | 1.26 (0.82, 1.93) |
| Sensitivity analysis 3 d |  |  |  |
| No. of deaths | 632 | 481 | 151 |
| Hazard ratio (95% confidence interval) | 1.01 (0.85, 1.20) | 1 [Reference] | 1.09 (0.65, 1.81) |
| Sensitivity analysis 4 e |  |  |  |
| No. of deaths | 525 | 394 | 131 |
| Hazard ratio (95% confidence interval) | 1.08 (0.92, 1.26) | 1 [Reference] | 1.38 (0.82, 2.33) |

a Complex survey designs are considered for all estimates. Risk estimates were adjusted for baseline age, sex, race/ethnicity, education level, marital status, family income poverty ratio level, drinking and smoking status, body mass index, and self-reported general health.

b Risk estimates were additionally adjusted for baseline history of diabetes, chronic kidney disease, cardiovascular diseases, hypertension, hyperlipemia, chronic obstructive pulmonary diseases.

c Participants with the extreme 1% of the NLR ratio were excluded. A total of 628 participants were further excluded in analyses due to being extreme 1% of NLR.

d Participants with less than 35 months of follow-up were excluded. A total of 5291 participants were further excluded in analyses due to less than 35 months of follow up.

e Participants with prevalent diabetes or cardiovascular diseases were excluded. A total of 7677 participants were further excluded in analyses due to having these diseases.

Abbreviations: NLR, neutrophil-lymphocyte ratio.

**eTable 5**. Sensitivity Analyses for the Association of NLR Levels with Cardiovascular Disease Mortality a

|  | **NLR level** | | |
| --- | --- | --- | --- |
|  | **Continuous NLR** | **Low-NLR** | **High-NLR** |
| All participants |  |  |  |
| No. of deaths | 904 | 622 | 282 |
| Hazard ratio (95% confidence interval) | 1.09 (0.99, 1.19) | 1 [Reference] | 1.44 (0.96, 2.16) |
| Sensitivity analysis 1 b |  |  |  |
| No. of deaths | 904 | 622 | 282 |
| Hazard ratio (95% confidence interval) | 1.09 (1.00, 1.20) | 1 [Reference] | 1.39 (0.92, 2.08) |
| Sensitivity analysis 2 c |  |  |  |
| No. of deaths | 872 | 609 | 263 |
| Hazard ratio (95% confidence interval) | 1.18 (0.99, 1.40) | 1 [Reference] | 1.39 (0.92, 2.12) |
| Sensitivity analysis 3 d |  |  |  |
| No. of deaths | 649 | 449 | 200 |
| Hazard ratio (95% confidence interval) | 1.10 (0.97, 1.24) | 1 [Reference] | 1.48 (0.91, 2.38) |
| Sensitivity analysis 4 e |  |  |  |
| No. of deaths | 484 | 333 | 151 |
| Hazard ratio (95% confidence interval) | 1.13 (0.99, 1.28) | 1 [Reference] | 1.58 (0.91, 2.74) |

a Complex survey designs are considered for all estimates. Risk estimates were adjusted for baseline age, sex, race/ethnicity, education level, marital status, family income poverty ratio level, drinking and smoking status, body mass index, and self-reported general health.

b Risk estimates were additionally adjusted for baseline history of cancer, diabetes, chronic kidney disease, hyperlipemia, chronic obstructive pulmonary diseases.

c Participants with the extreme 1% of the NLR ratio were excluded. A total of 628 participants were further excluded in analyses due to being extreme 1% of NLR.

d Participants with less than 35 months of follow-up were excluded. A total of 5291 participants were further excluded in analyses due to less than 35 months of follow up.

e Participants with prevalent cancer or diabetes were excluded. A total of 7687 participants were further excluded in analyses due to having these diseases.

Abbreviations: NLR, neutrophil-lymphocyte ratio.
